# Supplementary material for: Preparation of freestanding and ultrastable CsPbX3 perovskite quantum dots/SEBS composite films for curved and flexible surfaces
Source: Royal Society of Chemistry journal article supplement (doi:10.1039/d3tc02654j), 2023-01-01
Supplement: d3tc02654j1.pdf [file d3tc02654j1.pdf]

## Supporting Information

Preparation of Freestanding and Ultrastable CsPbX<sub>3</sub> Perovskite Quantum Dots/SEBS Composite Film for Curved and Flexible Surfaces

*Yin Lv,<sup>‡</sup> Shuhua Tu,<sup>‡</sup> Min Chen\**

Department of Materials Science and State Key Laboratory of Molecular Engineering of Polymers,  
Advanced Coatings Research Center of Ministry of Education of China, Fudan University, Shanghai 200433,  
PR China

Corresponding Author

\*Email: chenmin@fudan.edu.cn

Min Chen

**1. Calculation of  $S_{1/w}$  (CsPbBr<sub>3</sub> PQDs/SEBS/cyclohexane dispersion):** According to  $S_{1/w} = \gamma_w - \gamma_l - \gamma_{l/w}$  (4), the coefficient  $S$  of CsPbBr<sub>3</sub> PQDs/SEBS/cyclohexane dispersion (0.15 g/ml, ambient temperature) can be calculated as  $S = \gamma_w - \gamma_l - \gamma_{l/w} = (72.0 - 24.7 - 31.8) \text{ mN/m} = 15.5 \text{ mN/m}$ .

## 2. Supplementary Figures.

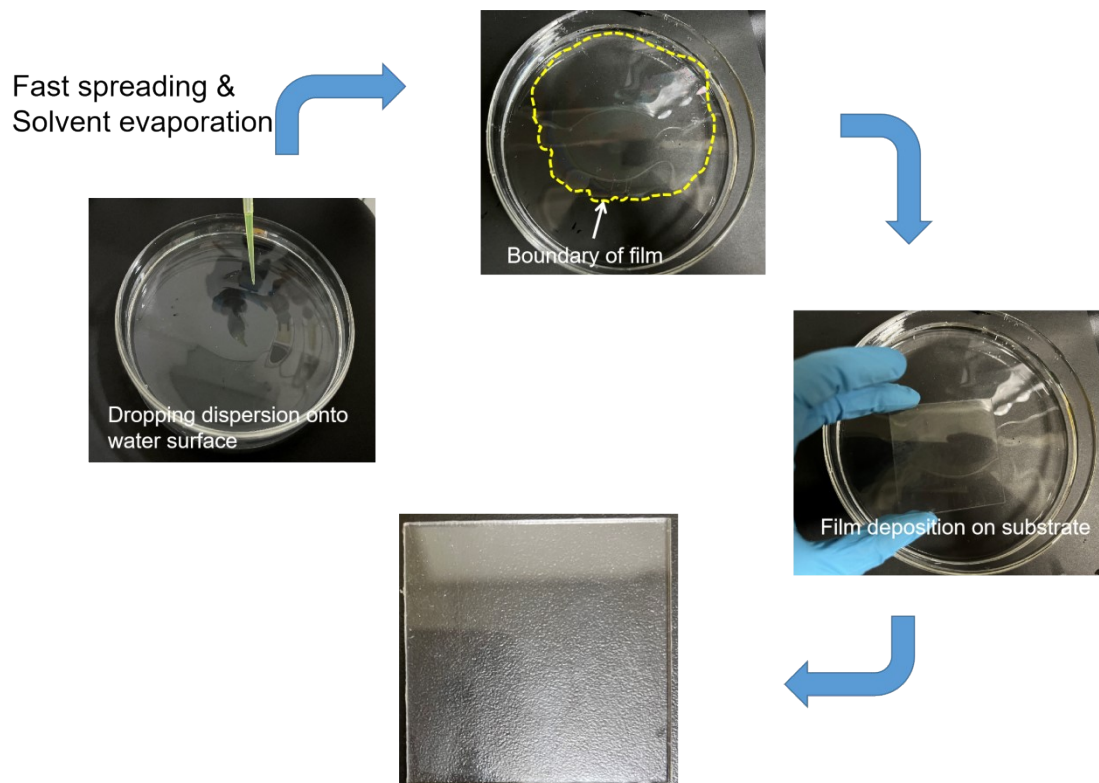

**Figure S1.** Photographs of the fabrication of CsPbX<sub>3</sub> perovskite quantum dots (PQDs)/polymer composite films.

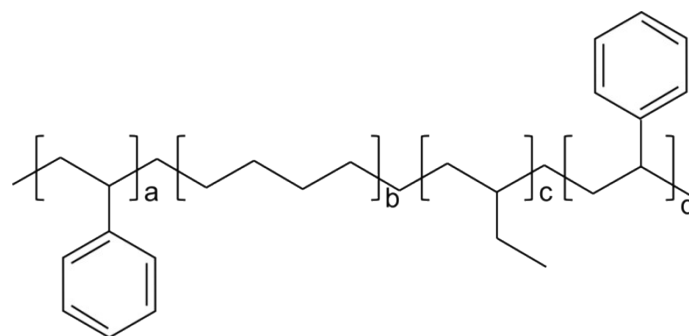

**Figure S2.** The structure of poly(styrene-ethylene-butylene-styrene) (SEBS) block copolymer.

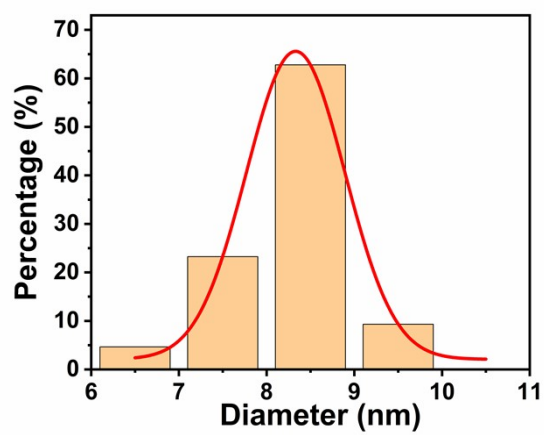

**Figure S3.** Histogram of particle-size distribution of CsPbBr<sub>3</sub> PQDs.

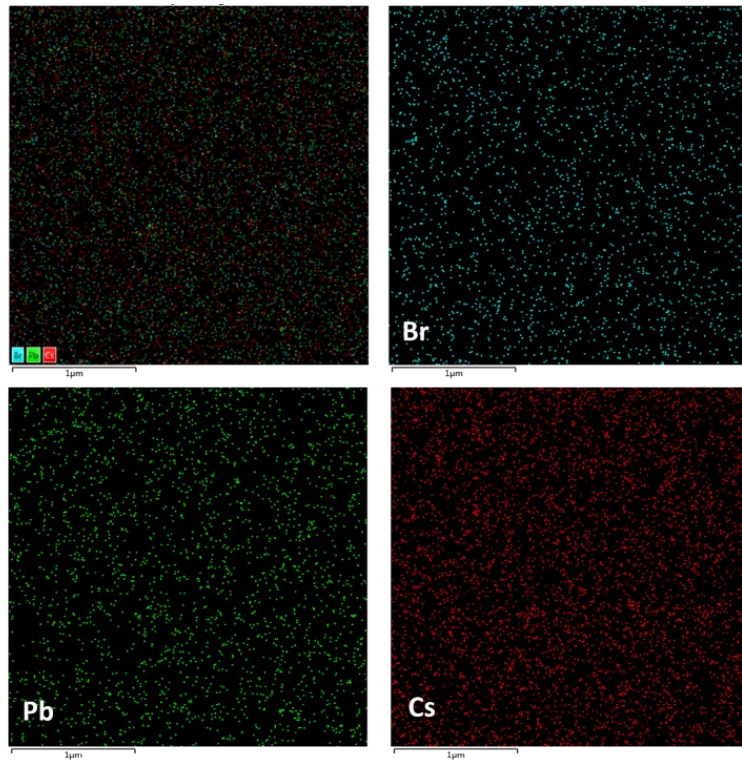

**Figure S4.** Electronic image and elemental mapping of CsPbBr<sub>3</sub> PQDs/polymer composite films.

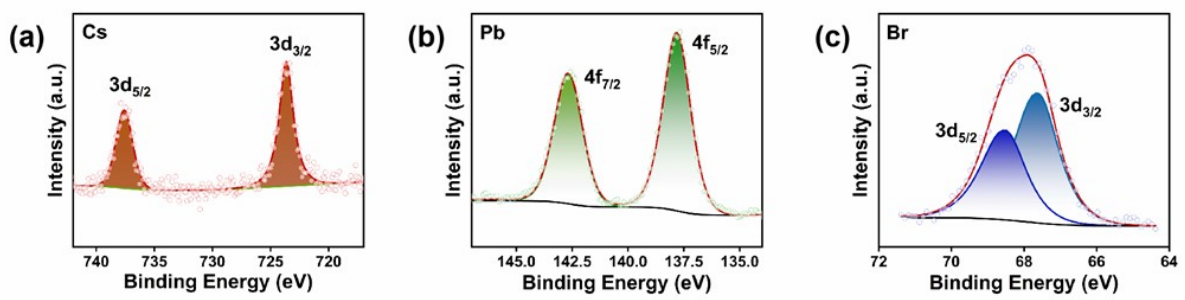

**Figure S5.** XPS spectra of (a) Cs 3d, (b) Pb 4f, and (c) Br 3d

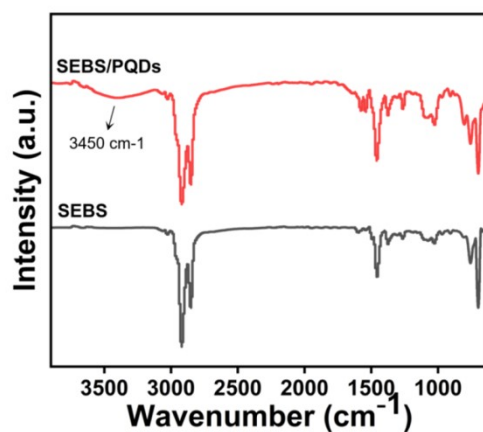

**Figure S6.** FTIR spectra of the CsPbBr<sub>3</sub> PQD/polymer composite film and the raw material of SEBS.

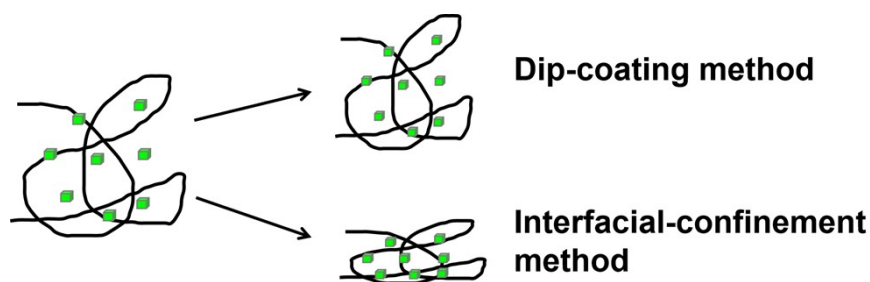

**Figure S7.** Conformation model of films by dip-coating and interfacial-confinement methods.

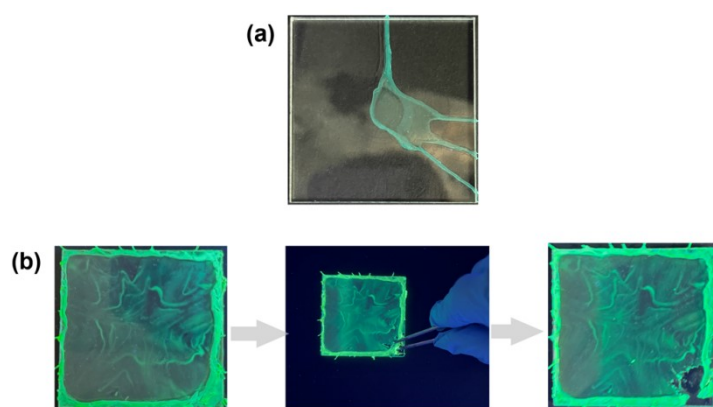

**Figure S8.** (a) Photographs of film fabricated by spin-coating, adding 40  $\mu\text{L}$  of precursor solution (0.15 g/mL). (b) Tearing process of a film fabricated by spin-coating.

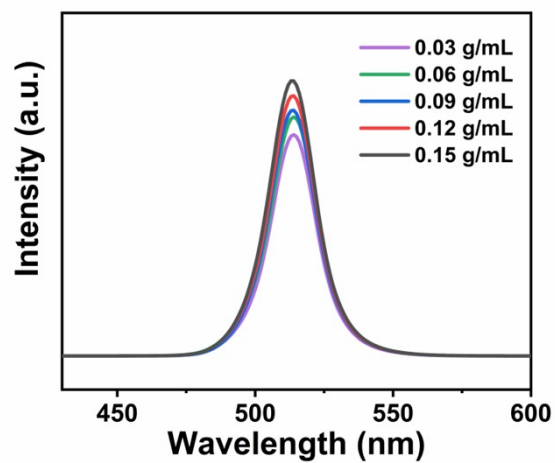

**Figure S9.** PL spectra of films with different concentrations of SEBS solution.

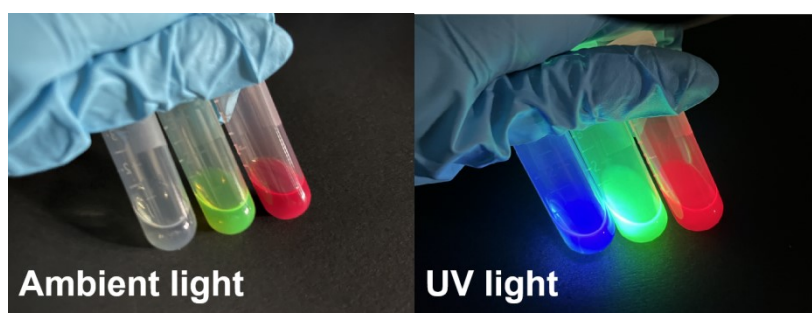

**Figure S10.** Photographs of CsPbX<sub>3</sub> PQDs from blue to red under ambient light and UV light.

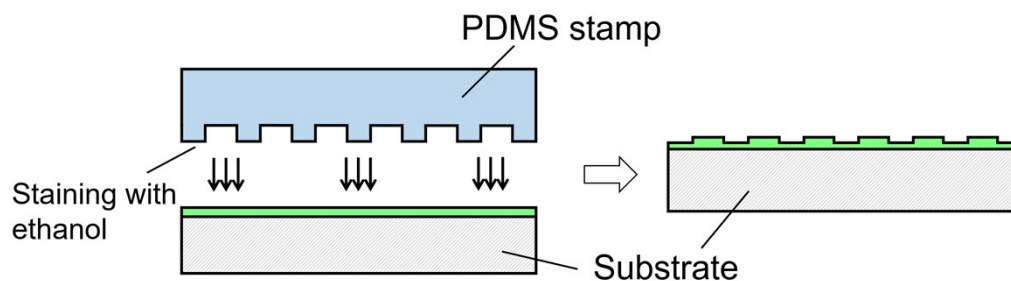

**Figure S11.** Illustration of patterning on the film using poly(dimethylsiloxane) (PDMS) stamp.
